# Supplementary material for: Multi-shell structured upconversion nanocarriers that combine IDO inhibitor-induced immunotherapy with NIR-triggered photodynamic therapy for deep tumors
Source: Royal Society of Chemistry journal article supplement (doi:10.1039/d3bm00248a), 2023-01-01
Supplement: d3bm00248a1.pdf [file d3bm00248a1.pdf]

## Supporting Information

### **Multi-shell structured upconversion nanocarriers that combine IDO inhibitor-induced immunotherapy with NIR-triggered photodynamic therapy for deep tumors**

**Jongseon Choi<sup>a</sup> and So Yeon Kim<sup>a,b,\*</sup>**

<sup>a</sup> Graduate School of Energy Science and Technology, Chungnam National University, Daejeon 34134, Korea.

<sup>b</sup> Department of Chemical Engineering Education, College of Education, Chungnam National University, Daejeon 34134, Korea.

\* Corresponding author. Tel.: +82 42 821 5892  
E-mail address: a (S.Y. Kim)

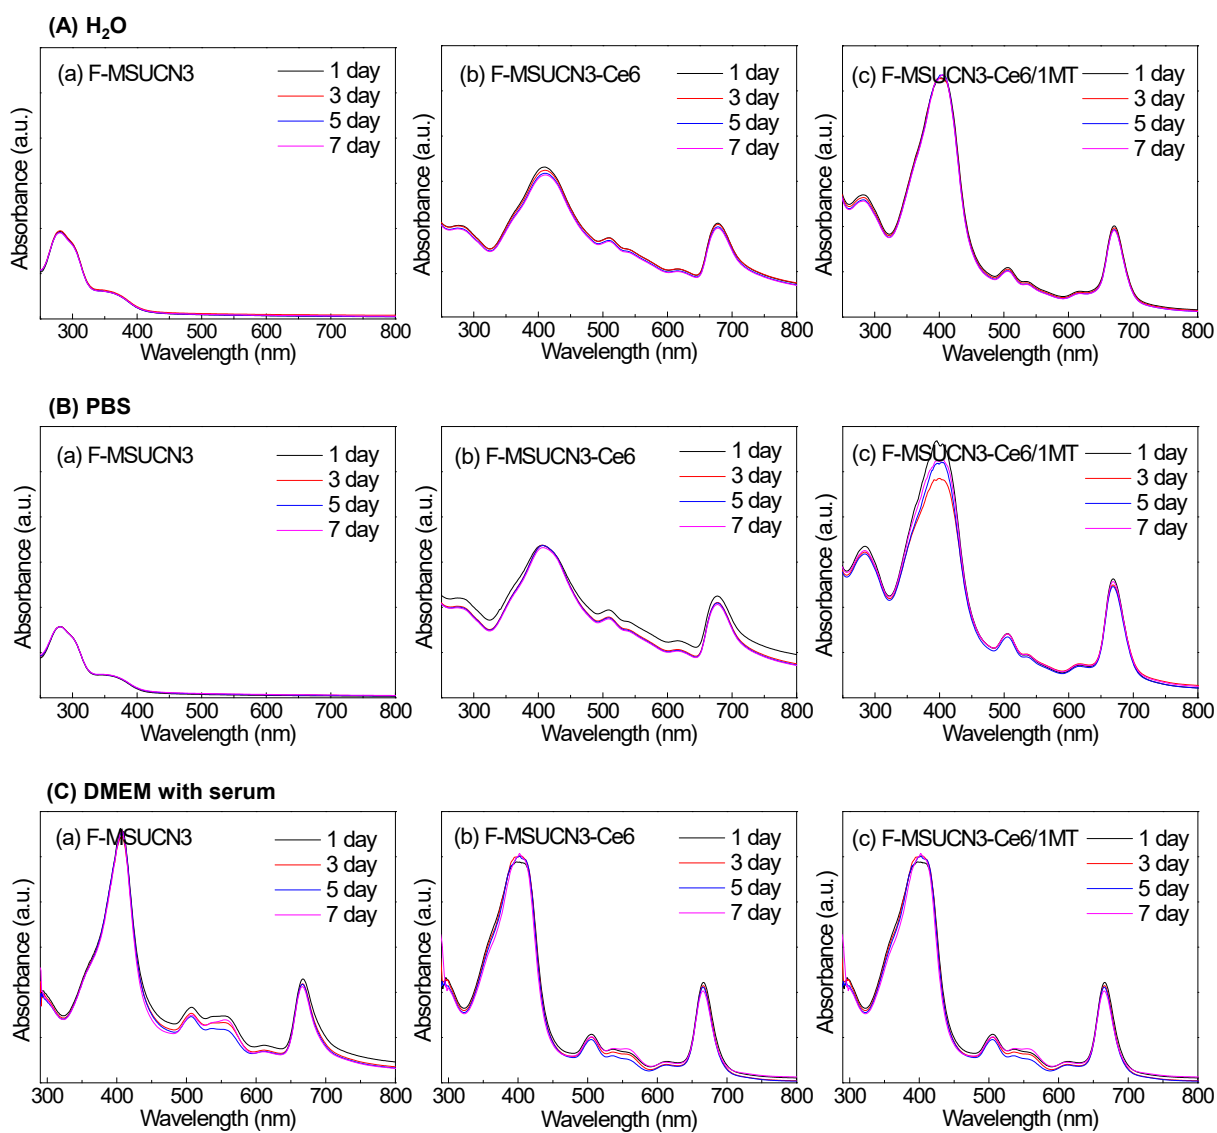

Figure S1. UV-vis spectra of (a) F-MSUCN3, (b) F-MSUCN3-Ce6, and (c) F-MSUCN3-Ce6/1MT over time under H<sub>2</sub>O, PBS, and DMEM (with serum) conditions.
